# Supplementary material
Source: publisher site journal article supplement (https://www.spandidos-publications.com/1184/downloadSupplementary)

Figure S1. Cell morphology. Cell fragments are depicted using arrows and are evidence of cell death through the process of apoptosis. Imaged using an inverted microscope (magnification, x200).

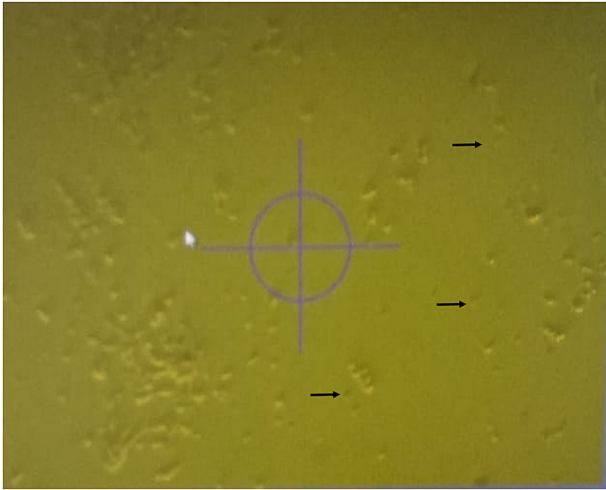

Supplement: Supplementary file 1 [file downloadSupplementary]
